# Supplementary material for: Effects of chronic cholinergic stimulation associated with aerobic physical training on cardiac morphofunctional and autonomic parameters in spontaneously hypertensive rats
Source: PubMed Central journal article supplement (PMC8387354; doi:10.1038/s41598-021-96505-2), 2021-08-25
Supplement: 41598_2021_96505_MOESM1_ESM.pdf [file 41598_2021_96505_MOESM1_ESM.pdf]

# **Effects of chronic cholinergic stimulation associated with aerobic physical training on cardiac morphofunctional and autonomic parameters in spontaneously hypertensive rats**

Camila B. Gardim<sup>1</sup>; Ana Catarine V. Oliveira<sup>1</sup>; Bruno A. Aguilár<sup>1</sup>; Stella V. Philbois<sup>1</sup>, Hugo C. D. Souza<sup>1\*</sup>

<sup>1</sup> Ribeirão Preto Medical School, University of São Paulo, Ribeirão Preto, SP, Brazil

\*Corresponding author: [hugocds@fmrp.usp.br](mailto:hugocds@fmrp.usp.br)

## **Results**

Aerobic physical training increased the total variance, oscillation of LF in absolute units, and LF/HF ratio. In turn, pyridostigmine bromide treatment increased the oscillation of both LF and HF in absolute units. On the other hand, the association of both to aerobic physical training attenuated the oscillation of HF in absolute units and increased the LF/HF ratio.

**Table S1.** Values of cardiac autonomic tonic balance after the pharmacological blockade with methylatropine and propranolol and heart rate variability.

|                                | UNTRAINED   |             |             | TRAINED     |             |             | Training Factor             |        | Drug Factor                  |        | Interaction                 |        |
|--------------------------------|-------------|-------------|-------------|-------------|-------------|-------------|-----------------------------|--------|------------------------------|--------|-----------------------------|--------|
|                                | Vehicle     | Pyr-5mg     | Pyr-15mg    | Vehicle     | Pyr-5mg     | Pyr-15mg    | F(d.f.)                     | P      | F(d.f.)                      | P      | F(d.f.)                     | P      |
| <b>Autonomic tonic control</b> |             |             |             |             |             |             |                             |        |                              |        |                             |        |
| HR / methylatropine, bpm       | 397 ± 4     | 376 ± 3     | 357 ± 5     | 380 ± 5     | 362 ± 3     | 360 ± 2     | F <sub>(1,53)</sub> : 7.75  | 0.008  | F <sub>(2, 53)</sub> : 26.03 | <0.001 | F <sub>(2,53)</sub> : 3.15  | 0.052  |
| Δ HR / methylatropine, bpm     | 18 ± 2      | 32 ± 1      | 31 ± 3      | 30 ± 1      | 27 ± 1      | 46 ± 4      | F <sub>(1,53)</sub> : 18.21 | <0.001 | F <sub>(2, 53)</sub> : 23.39 | <0.001 | F <sub>(2,53)</sub> : 13.99 | <0.001 |
| HR / propranolol, bpm          | 307 ± 7     | 299 ± 9     | 285 ± 2     | 300 ± 8     | 288 ± 5     | 278 ± 7     | F <sub>(1,53)</sub> : 4.23  | 0.045  | F <sub>(2, 53)</sub> : 8.97  | <0.001 | F <sub>(2, 53)</sub> : 0.08 | 0.925  |
| Δ HR / propranolol, bpm        | 72 ± 5      | 45 ± 7      | 41 ± 5      | 50 ± 2      | 47 ± 8      | 36 ± 5      | F <sub>(1,53)</sub> : 7.89  | 0.007  | F <sub>(2, 53)</sub> : 21.17 | <0.001 | F <sub>(2, 53)</sub> : 5.61 | 0.006  |
| IHR, bpm                       | 331 ± 5     | 305 ± 2     | 296 ± 6     | 315 ± 5     | 295 ± 4     | 295 ± 2     | F <sub>(1,53)</sub> : 5.75  | 0.002  | F <sub>(2, 53)</sub> : 17.49 | <0.001 | F <sub>(2, 53)</sub> : 1.29 | 0.283  |
| <b>Heart rate variability</b>  |             |             |             |             |             |             |                             |        |                              |        |                             |        |
| PI, ms                         | 158 ± 2     | 174 ± 5     | 184 ± 2     | 171 ± 3     | 179 ± 3     | 191 ± 5     | F <sub>(1,53)</sub> : 4.79  | 0.033  | F <sub>(2,53)</sub> : 12.06  | <0.001 | F <sub>(2,53)</sub> : 0.36  | 0.700  |
| Variance, ms <sup>2</sup>      | 30 ± 2      | 37 ± 2      | 37 ± 1      | 40 ± 3      | 42 ± 3      | 42 ± 2      | F <sub>(1,53)</sub> : 6.44  | 0.014  | F <sub>(2,53)</sub> : 1.12   | 0.334  | F <sub>(2,53)</sub> : 0.38  | 0.687  |
| LF, ms <sup>2</sup>            | 1.5 ± 0.1   | 1.4 ± 0.1   | 2.3 ± 0.2   | 1.7 ± 0.1   | 2.1 ± 0.06  | 2.5 ± 0.1   | F <sub>(1,53)</sub> : 8.76  | 0.005  | F <sub>(2,53)</sub> : 15.8   | <0.001 | F <sub>(2,53)</sub> : 1.82  | 0.173  |
| LF, nu                         | 21 ± 2      | 21 ± 3      | 17 ± 0.6    | 22 ± 0.7    | 20 ± 3      | 25 ± 2      | F <sub>(1,53)</sub> : 2.36  | 0.131  | F <sub>(2,53)</sub> : 0.14   | 0.874  | F <sub>(2,53)</sub> : 3.10  | 0.054  |
| HF, ms <sup>2</sup>            | 4.5 ± 0.3   | 5.6 ± 0.4   | 11 ± 0.3    | 6.6 ± 0.4   | 5.7 ± 0.5   | 7.0 ± 0.4   | F <sub>(1,53)</sub> : 3.74  | 0.059  | F <sub>(2,53)</sub> : 52.3   | <0.001 | F <sub>(2,53)</sub> : 32.2  | <0.001 |
| HF, nu                         | 79 ± 2      | 79 ± 3      | 83 ± 0.6    | 78 ± 1      | 80 ± 3      | 74 ± 2      | F <sub>(1,53)</sub> : 1.66  | 0.204  | F <sub>(2,53)</sub> : 0.1    | 0.906  | F <sub>(2,53)</sub> : 1.22  | 0.304  |
| LF/HF ratio                    | 0.29 ± 0.03 | 0.24 ± 0.01 | 0.20 ± 0.01 | 0.25 ± 0.03 | 0.31 ± 0.05 | 0.34 ± 0.02 | F <sub>(1,53)</sub> : 5.86  | 0.019  | F <sub>(2,53)</sub> : 0.06   | 0.945  | F <sub>(2,53)</sub> : 5.72  | 0.006  |

All values are presented as the mean ± SEM. Pyr-5 mg, pyridostigmine bromide treatment at a dose of 5 mg/kg/day; Pyr-15 mg, pyridostigmine bromide treatment at a dose of 15 mg/kg/day bpm, beats per minute; HR, heart rate; Δ HR, heart rate variation delta; IHR, intrinsic heart rate; PI, pulse interval; ms, milliseconds; LF, low frequency band; nu, normalized units; HF, high frequency band; F, factor; df, degrees of freedom.
